# Supplementary material for: Synthesis and characterization of two novel mixed metal tellurates: KGaTeO5·H2O and K3GaTe2O8(OH)2·H2O
Source: Royal Society of Chemistry journal article supplement (doi:10.1039/b312519j), 2004-01-01
Supplement: b312519j.pdf [file b312519j.pdf]

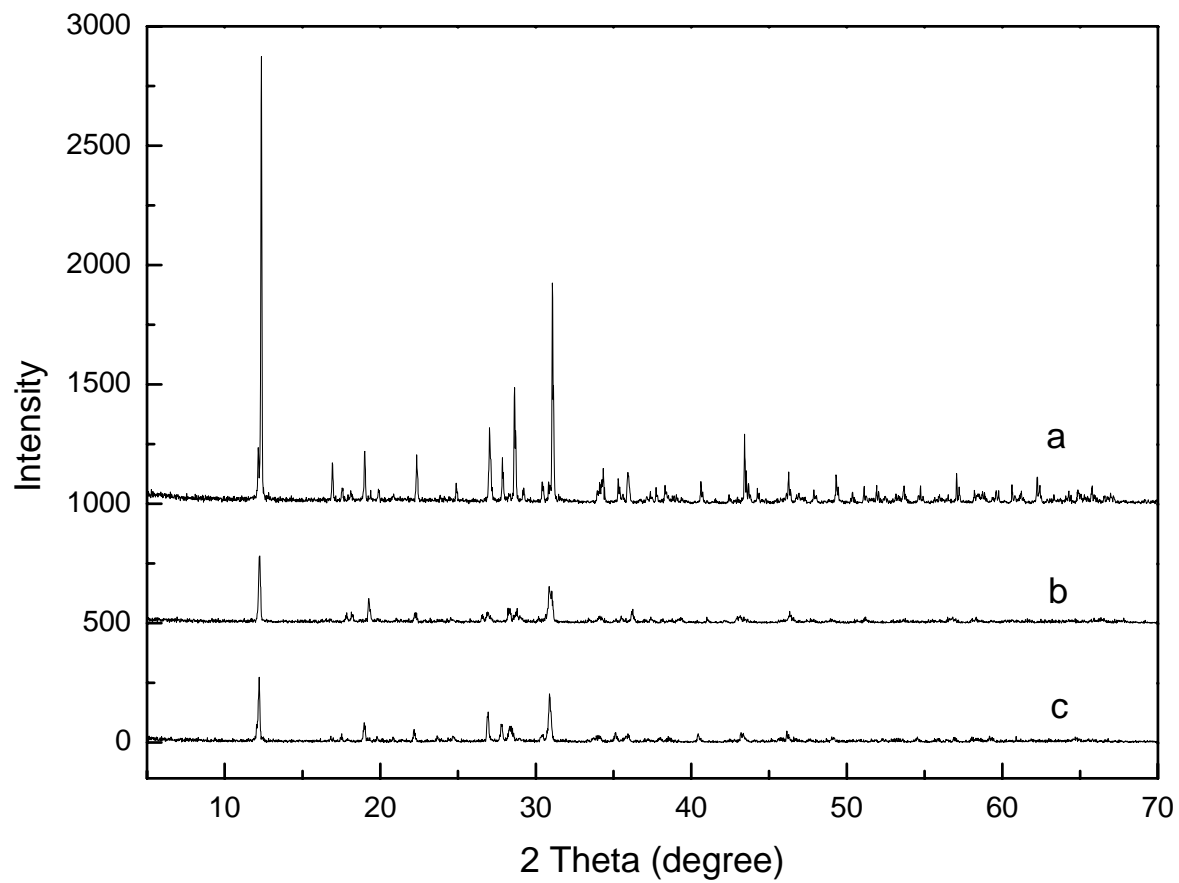

XRD patterns of (a)  $\text{KGaTeO}_5 \cdot \text{H}_2\text{O}$ ; (b)  $\text{Na}^+$ -exchanged  $\text{KGaTeO}_5 \cdot \text{H}_2\text{O}$ ; (c)  $\text{Rb}^+$ -exchanged  $\text{KGaTeO}_5 \cdot \text{H}_2\text{O}$
